# Supplementary material for: VASP-E: Specificity Annotation with a Volumetric Analysis of Electrostatic Isopotentials
Source: PLOS journal article supplement (doi:10.1371/journal.pcbi.1003792), 2014-08-28
Supplement: S5 (10.1371/journal.pcbi.1003792.s005) [file journal.pcbi.1003792.s005]

301 Moved Permanently

# Moved Permanently

The document has moved here.

---

Apache Server at www.ploscompbiol.org Port 80
